# Supplementary material for: CD8+ T-Cell Responses in COVID-19 Convalescent Individuals Target Conserved Epitopes From Multiple Prominent SARS-CoV-2 Circulating Variants
Source: Oxford University Press journal article supplement (doi:10.1093/ofid/ofab143), 2021-03-30
Supplement: ofab143_suppl_supplementary_figure_s1.pdf [file ofab143_suppl_supplementary_figure_s1.pdf]

**Figure S1:**

Nucleoprotein

MSDNGPQNRNAPRITFGGSPDSTGSNQNGERSGARSQRRPQGLPNNTASWFTALTQHGKEDLKFPRGQVPINT  
NSSPDDQIGYRRATRRIRGGDGKMKDLSPRWYFYLLGTGPEAGLPYGANKDGIIWVATEGALNTPKDHIGTRNPAN  
NAAIVLQLPQGTTLPKGFYAEGRGGSQASSRSSRSRNRSSRNSTPGSSRGTSPARMAGNGGDAALALLLDRLNQL  
KMSGKGQQQQGQTVTKKSAEASKKPRQKRTATKAYNVTQAFGRRGPEQTQGNFGDQELIRQGTDYKHWPQIAQF  
APSASAFFGMSRIGMEVTPSGTWLTYTGAIKLDDKDPNFKDQVILLNKHIDAYKTFPTEPKDKKKKADETQALPQRQ  
KKQQTVTLPAADLDDFSKQLQQSMSSADSTQA

ORF7a

MKIILFLALITLATCELYHYQECVRGTTVLLKEPCSSGTYEGNPFPHLADNKFALTCFSTQFAFACPDGVKHVYQLRARSV  
SPKLFIRQEEVQELYSPIFLVAAIVFITLCFTLKRKTE

ORF3a

MDLFMRIFTIGTVTLKQGEIKDATPSDFVRATATIPIQASLPFGWLIVGVALLAVFSASKIITLKRWQLALSKGVHFC  
NLLLLFVTYSHLLVAAGLEAPFLYLYALVYFQSINFRIMRLWLCWKCRSKNPLLYDANYFLCWHTNCYDYCIPYNSV  
TSSIVITSGDGTTSPISEHDYQIGGYTEKWESGVKDCVVLHSYFTSDYYQLYSTQLSTDTGVEHVTFIYNKIVDEPEEHVQ  
IHTIDGSSGVVNPVMEPIYDEPTTTTSVPL

ORF1ab

MESLVPGFNEKTHVQLSLPVLQVRDVLVRGFGDSVEEVLSEARQHLDGTCGLVEVEKGVLPQLEQPYVFIKRS DARTAPHGHVMV  
ELVAELEGIQYGRSGETLGVLPVHVGEIPVAYRKVLLRKNNGKAGGHSYGADLKSFDLGDDELGTDPEYEDFQENWNTKHSSGVREL  
MRELNGGAYTRYVDNFCGPDGYPLECIKDLLARAGKASCTLSEQLDFIDTKRGVYCCREHEHEIAWYTERSEKSYELQTPFEIKLAKK  
FDTFNGECPNFVPLNSIITIQPRVEKPKLDGFMGRIRSVYPVASPNECNQMCLSTLMKCDHCGETSWQTGDFVKATCEFCGTENL  
TKEGATTCGYLPQNAVVKIYCPACHNSEVGPHEHSLAEYHNESGLKTLRKGRTIAFGGCVFSYVGCHNKAYWVPRASANIGCNHT  
GVVGESEGLNDNLLEILQKEKNINIVGDFKLNIEAIIILASFSASTSAFVETVKGLDYKAFKQIVESCGNFVKTKGAKKGAWNIGE  
KSILSPLYAFASEARVRSIFSRTLETAQNSVRVLQKAAITLDGISQYSLRLIDAMMFTSDLATNNLVVMAYITGGVVQLTSQWL  
TNI FGTVYEKLPVLDWLEEKFEKGEVFLRDGWEIVKFISTCACEIVGGQIVTCAKEIKESVQTFKLVNKFALCADSIIIGGAKL  
KALNLGE TFWTHSKGLYRKCVRKREETGLLMPLKAPKEIIFLEGETLPTTEVVLTKGDLQPLEQPTSEAVEAPLVGTPVCINGLM  
LLEIKDTEK YCALAPNMMVTNNTFTLKGGAAPTQVTFGDDTVIEVQGYKSVNITFELDERIDKVLNEKCSAYTVELGTEVNEFACV  
VADAVIKTLQP VSELLTPLGIDLDEWSMATYYLFDSEGEFKLASHMYCSFYPPDEDEEGDCEEEEFEPSTQYEGTEDDYQ  
GKPLEFGATSAAALQPEE EQEEDWLDLDDSDQQTGQDGSQDSEDNQTITQITIVEVQPQLEMELTPVVQTEIVNSFSGY  
LKLTDNVYIKNADIVEEAKVKPTVVVN AANVYLKHGGGVAGALNKATNNAMQVESDDYIATNGPLKVGSCVLSGHNLAKH  
CHLVVGPVNVKGEDIQLLKSAYENFNQHEV LLAPLLSAGIFGADPIHSLRVCVDTVRTNVYLAVFDKNLYDKLV  
SSFLEMKSEKQVEQKIAEIPKEEVKPFITESKPSVEQRKQDDKKIKA CVEEVTTTLEETKFLTENLLYIDINGNL  
HPDSATLVSDDITFLKADAPYIVGDVVQEGVLTAVVIPTKKAGGTTEMLAKALRVPPTDN YITTYPGQGLNGY  
TVEEAKTVLKKCKSAFYILPSIISNEKQEILGTVSWNLREMLAHAEETRKLMPVCVETKAIVSTIQRKYKGIKIQEGV  
VDYGARFYFYSKTTVASLINTLNDLNETLVTMPLGYVTHGLNLEEAARYMRSLKVPATVSVSPDAVTAYNGYLTSSSKT  
PEEHFIEIT SLAGSYKDWYSYGQSTQLGIEFLKRGDKSVYYSNPTTFHLDGEVITFDNLKTLLSREVRTIKVFTTVDNINLHT  
QVVDMSMTYGGQ FGPTYLDGADVTKIPHNSHEGKTFYVLPNDDTLRVEAFEYHTTDPSTLGRYMSALNHTKWKYPQV  
NGLTSIKWADNNCYLATA LTLTQQIELKFNPPALQDAYRRARAGEAANFCALILAYCNKTVGELGDVRETM  
SYLFQHANLDSCKRVLNVVCKTCGQQQTTLKQVE AVMYMGTLSYEQFKGVQIPCTCGKQATKYL  
VQQESPVMMSAPPAQYELKHGFTFCASEYTGNYQCCHYKITSKETLYCIDGAL LTKSSEYKGPITDV  
FYKENSYTTTIKPVTYKLDGVVCTEIDPKLDNYKKNDSYFTEQPIDLVPNQYPNASFDNFKVC  
DNIFADDLNLQTGYKPPASRELKVTFFPDNGDVVAIDYKHYTPSFKKAGALLHKPIVWHVNNATNKATYK  
PNTWCIRCLWSTKPVETSNSFDVLK SEDAQGMNDLACEDLKPVSEEVVENPTIQKDVLECNVKT  
TEVVGDIILKPANNSLKITEEVGHTDLMAAYVDNSSLTIKPNELSRVL GLKTLATHGLAAVNSV  
PVDTIANYAKPFLNKVVSTTNIIVTRCLNRVCTNYMPYFFTLQLLCTFTRSTNSRIKASMP  
TTIAKNVKSV GKFCLEASFNYLKSPNFSKLINIIWFLLSVCLGSLIYSTAALGVLSNLGMP  
SYCTGYREGYLNSTNVTIATYCTGSIPCSVCLSGLDSL DTPYSLETIQTISSFKWDLTAFGLVA  
EWFAYILFRFFYVGLAAIMQLFFSYFAVHFISNSWLMWLIINLVQMAPISAMV RMYIFFA

SFYVWKSYPVHVVDGCSNSTCMMCYKRNRATRVECTIVNGVRRSFYVYANGGKGFCKLHNWNCVNCDFCAGSTFISDEVARDL  
SLQFKRPINPTDQSSYIVDSVTVKNGSIHLYFDKAGQKTYERHLSHFVNLNLRANNTKGSPLINVIVFDGKSKCEESSAKSASVYYSQ  
LMCQPILLDDQALVSDVGDSEAVAVKMFDAYVNTFSSTFNVPMEKLTLVATAEAEELAKNVSLDNVLFSTFISAARQGFVDSVETKD  
VVECLKLSHQSDIEVTGDCSCNNYMLTYNKVENMTPRDLGACIDCSARHINAQVAKSHNIALIWNVKDFMSLSEQLRKQIRSAAKKN  
NLPFKLTCATTRQVNVVTTKIALKGGKIVNWNKQLIKVTLVFLVAAIFLITPVHVMKHTDFSSEIIGYKAIDGGVTRDIASDTDCF  
ANKHADFDTWFSQRGGSYTNDAKCLIAAVITREVGFFVPLPGTILRTTNGDFLHFLPRVFSAVGNICYTPSKLIEYDFATSACVLA  
AECTIFKDASGKPVPCYDNTNVEGVSAYESLRPDTRYVLM DGSIIQFPNTYLEGSRVVTTFDSEYCRHGTCERSEAGVCVSTSGRW  
VLNNDYYRSLPGVFCGVDVAVNLLTNMFTPLIQIPIGALDISASIVAGGIVAVVTCLAYYFMRFRRAFGEYSHVAVFNTLLFLMSFTVLC  
LTPVYSFLPGVYSVIYLYLTFYLTNDVSLAHIQWMVMFTPLVPFWITAIYIICISTKHFWFFSNYLKRRVVFNGVFSSTFEAALCTFLL  
NKEMYLKLRSDVLLPTQYNRYLALYNKYKFSGAMDTTSYREAACCHLAKALNDFSNVSGSDVLYQPPQTSITSAVLQSGFRKMAFP  
SGKVEGCMVQVTCGTTTLNGLWLDVVYCPRHVICSEDMLNPNYEDLLIRKSNHNFVQAGNVQLRVIGHSMQNCVLKLVDT  
ANPKTPKYKRVRIQPGQTFSVLACYNGSPSGVYQCAMPNFTIKGSFLNGSCGSGVFNIDYDCVFCYMHMELPTGVHAGTDLEG  
NFY GPFVDRQTAQAAGTDDTTITVNLAWLYAAVINGDRWFLNRFTTTLNDFNLVAMKYNIEPLTQDHVDILGPLSAQTGIAVLDL  
CASLKELLQNGMNGRTILGSALLEDEFTPFVVRQCSGVTFQSAVKRTIKGTHHWLLLTLTSLLVQSTQWSLFFFLYENAFLPFAM  
GIIAMSAFAMMFVKHKHAFCLFLLPLATVAYFNMVMPASWVMRIMTWLDMVDTSLSGFKLKDVCMYASAVLLILMTARTV  
YDDGARRVWTLMNVLTLVYKVVYGNALDQAISMWALIISVTSNYSVGVVTTVMFLARGIVFMCVEYCPFIITGNTLQCIMLVYCFGL  
YFCTCYFGLFCLLNRYFRLTLGVYDYLSTQEFYRMSQGLLPPKNSIDAFKLNILKLVGGKPCIKVATVQSKMSDVKCTSVLLSVL  
QQLRVESSSKLWAQCVLHNDILLAKDTTEAFEKMSVLLSVMQGAVDINKLCEEMLDNRATLQAIASEFSSLPYAAAFATAQEA  
YEQAVANGDSEVLLKLLKSLNVAKSEFDRDAAMQRKLEKMAQAMTQMYKQARSEDKRAKVTSAMQTMFLTMLRKLDNDAL  
NNIINNARDGCVPLNIPLTTAAKLMVIPDYNTYKNTCDGTTFTYASALWEIQQV DADSKIVQLSEISMNPNLAWPLIVTALRA  
NSAVKLQNNELSPVALRQMCAAGTTQACTDDNALAYYNTTKGGRFVLLSDDLQDLKWARFPKSDGTGTIYTELEPPCRFVDT  
PKGPKVKYLYFIKGLNLRGMVGLSAAVRLQAGNATEVPANSTVLSFCFAVDAKAYKDYLASGGQPITNCVKMLCTHTGTG  
QAITVTPEANMDQESFGGASCCLYCRCHIDHPNPKGFCDLKGKYVQIPTTCANDPVGFTLKNVCTVCGMWKGYGCSCDQLREP  
MLQSADAQSFLNRVCGVSAARLTPCGTGTSTDVYRAFDIYNDKVAGFAKFLKTNCCRFEKDEDDNLIDSYFVVKRHTFSNYQHE  
ETIYNLLKDCPAVAKHDFKFRIDGDMVPHISRQLTKYTMADLVYALRHFDGNCDDLKEILVTYNCCDDDFYNNKDWYDFVENPD  
ILRVYANLGERVRQALLKTVOFCDAMRNAGIVGLTLDNQLNGNWYDFGDFIQTPGSGVPPVDSYSLMLPILTRALTAESHV  
DIDLTKPIYKWDLLKYDFTEERLKLFDRYFKYWDQTYHPNCVCLDDRCILHCANFNVLSTVFPPTSGFPLVRKIFVDGVPFVSTG  
YHFRELGVVHNQDVLNHSRSLFKELLVYAADPAMHAASGNLLLDKRTTCFVAALTNNAFQTVKPGFNKDFYDFAVSKGFFKE  
GSSVELKHFFFAQDGNAAISDYRYRNLPMTCDIRQLLFFVEVDKYFDCYDGGCINANQVIVNNDKSAAGFPFNKVGKARLYD  
SMSYEDQDALFAYTKRNVIPTITQMNLYAISAKNRARTVAGVSICSTMTNRQFHQKLLKSIAATRATVIGTSKYGGWHNMLK  
TVYSDVENPHLMGWDYPKCDRAMPNMLRIMASLVLARKHTCCSLSHRFYRLANECAQVLESEMVMCGGSLYVKGPGTSSGDATT  
AYANSVFNICQAVTANVNALLSTDGNKIADKYVRNLQHRLYECLYRNRDVTDFVNEFYAYLRKHFSMMLSDDAVVCFNSTYASQ  
GLVASIKNFKSVLYQNNVFMSEAKCWTTETDLTKGPHFECQHTMLVKQGGDYVYLPYDPSRILGAGCFVDDIVKTDGTLMIERFV  
SLAIDAYPLTKHPNQEYADVHLYLQYIRKLHDELTHMLDMYSVMLTNDNTSRYWEPEFYEAMYTPHTVLQAVGACVLCNSQTSL  
RCGACIRRPFLCCKCCYDHVISTSHKLVLSVNPYVCNAPGCDVTDVTLQYLGGMSSYCKSHKPPISFPLCANGQVFLYKNTCVGSD  
NVTDFNAIATCDWTNAGDYILANTCTERLKLFAAETLKATEETFKLSYGIATVREVLSRELHLSWEVKGPRPPLNRNYVFTGYRVTK  
NSKVQIGEYTFEKGDYGDAVVYRGTTTYKLVNGDYFVLTSHTVMPLSAPTLPVQEHYVRITGLYPTLNISDEFSSNVANYQKVMQK  
YSTLQGPPTGKSHFAIGLALYPSARIVYTACSHAAVDALCEKALKYLPIDKCSRIIPARARVCFDKFKVNSTLEQYVFTVNALPETT  
ADIVVFEISMATNYDLSVNNARLRAKHYYVIGDPAQLPAPRLLTKGTLEPEYFNSVCRMKTIGPDMFLGTCRRCPAEIVDVSAL  
VYDNKLAHKDKSAQCFKMFYKGVITHDVSSAINRPQIGVVREFLTRNPAPWRKAVFISPYNSQNAVASKILGLPTQTVDSQSGSEYD  
YVIFTQTTEHAHSCNVNRFNVAITRAKVGILCIMSDDRDLQFTSLIPRRNVATLQAENVTLGFKDCSKVITGLHPTQAPTHLSVD  
TKFKTEGLCVDIPGPKDMTYRRLISMMGFKMNYQVNGYPNMFITREEAIRHVRAWIGFDVEGCHATREAVGTNLPLQLGFSTGV  
NLVAVPTGYVDTPNNTDFSRVSAKPPPGDQFKHLIPLMYKGLPWNVVRIKIVQMLSDTLKNSDRVVFVLAHGFELTSMKYFVKI  
GPERTCCLDRRATCFSTASDTYACWHHS GFDYVYNPFMIDVQQWGFTGNLQSNHDLYCQVHGNNAHVASCDAIMTRCLAVHEC  
FVKRVDWTIEYPIIGDELKINAACRQVHMVKAALLADKFPVLHDIGNPKAIKCVQADVEWKFYDAQPCSDKAYKIEELFYSYATH  
SDKFTDGVCLFWNCNVDROPANSIVCRFDTRVLSNLLPGCDGGSLYVKNHAFHTPAFDKSAFVNLKQLPFFYYSDSPCESHGKQV  
VSDIDYVPLKSATCITRNLGGAVCRHHANEYRLYLDAYNMMISAGFSLVWVYQFDTYNLWNTFTRLQSLNFAFNVVKNKGFHDG  
QQGEVPSIINNTVYTKVDGVDVELFENKTLPVNVAFELWAKRNKIPVEVKILNNGVDIAANTVIWYDKRDAPAHISTIGVCSMT  
DIAKKTETICAPLTVFFDGRVDGQVDFRNARNGLITEGSKGLQPSVGPQASLNGVTLIGEAVKTFNYKVDGQVQQLPET  
YFTQSRNLQEFKPRSQMEIDFLELAMDEFIERYKLEGYAFEHIVYGDGFSHSQLGGLHLLIGLAKRFKESPFLEDFIPMDSTVKNYFITD  
AQTGSSKCVCSVIDLLDDFVEIISQDLSVSVKVVKTIDYTEISFMLWCKDGHVETFPKQSSQAWQPGVAMPNLYKMQRMILLE  
KCDLQNYGDSATLPKIMMNVAKYTQLCQYLNTLTLAVPYNMRVIHFGAGSDKGVAPGTAVLRQWLPTGTLVDSLDNDFVSDA  
DSTLIGDCATVHTANKWDLIISDMYDPKTKNVTKENDSKEGFFTYICGFIQKALALGGSVAIKITEHSWNADLYKLMGHFAWWTAF

VTNVNASSEAFILGICNYLGKPREQIDGYVMHANYIFWRNTNPIQLSSYSFLDMSKFPLKLRGTAVMSLKEGQINDMILSLLSKGRLII  
RENNRVVISDVLVNN

Figure S1: SARS-CoV-2 Wuhan variant protein amino acid sequence with CD8+ T cell epitopes highlighted and all mutations, insertions (box) and deletions (slash) sites indicated in bold orange (non-overlapping).
